# Supplementary material
Source: publisher site journal article supplement (https://www.dovepress.com/article/547289)
Supplement: Supplementary file 1 [file 547289_corneal%20donation%20questionnaire.docx]

Supplementary Figure 1: Corneal donation questionnaire.

First part: Demographic characteristics

- Age
- Sex
  1. Male
  2. Female
- City
  1. Makkah
  2. Jeddah
  3. AL-Madinah
- Nationality
  1. Saudi
  2. Non-Saudi
- Career/study major
  1. Medical field
  2. Non-medical field
- Level of education
  1. Elementary or middle school
  2. High school
  3. Bachelor
  4. Postgraduate study

Second part: questions to determine the level pf knowledge:

1. One pair of eyes is enough to restore vision for how many corneal blindness-affected individuals? 1- 1 person
2. 2-4 people
3. 6-8 people
4. Don’t know
5. Do you know the ideal time to harvest the corneas after death?

1- Yes 2- No

1. Don’t know
2. Do you think blood group mismatch prevents corneal donation?
   1. Yes 2- No

3- Don’t know

1. Do you believe that you have enough knowledge on cornea donation?
   1. Yes
   2. No
   3. Don’t know
2. If yes, what was the source of the information?
   1. Doctors or health care workers
   2. Friends/family members
   3. Social media
   4. Newspaper
   5. Television
   6. SMS
   7. This questionnaire
   8. None
3. How do you prefer to receive further information about this topic?
   1. Doctors or health care workers
   2. Friends/family members
   3. Social media
   4. Newspaper
   5. Television
   6. SMS
4. Do you know where and how to apply if you wanted to register for corneal donation?
   1. Yes
   2. No
   3. Don’t know
5. What are the barriers to donating your own relative’s cornea? (You can select more than one answer)
   1. You think it disfigures the donor’s face
   2. You think it is religiously prohibited
   3. You don’t know where to apply 4- Family objection

5- Other (please specify):

1. What would motivate you to donate your own corneas? (Select all that apply)
   1. You want to do good and get thawab
   2. You personally know someone who is blind
   3. If you had further information about this issue
   4. If your family received financial compensation
   5. None

Third part: Questions to determine the attitude

1. If one of your first-degree relatives died, would you donate his/her corneas?
   1. Yes 2- No

3- Don’t know

1. If you think donating corneas is important and will serve humanity, tell us why? (Select all that apply)
   1. Research
   2. Restoring others vision
   3. You don’t think donating corneas is important or serves humanity 4- Other (please mention):

Fourth part: questions to determine practices:

1. Are you willing to donate your corneas?
   1. Yes
   2. No
   3. Don’t Know
2. Would you spread information about cornea donation to others?
   1. Yes 2- No
3. Don’t know
